## Volume 1 Winter Issue

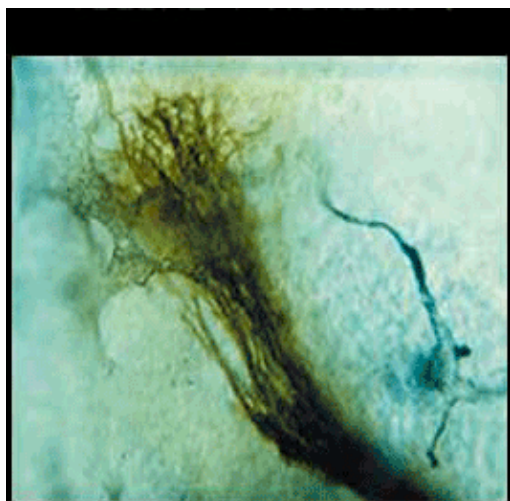

### Table of Contents

Use Arrows to Browse  
Previous Issues

### Contact CBE

8120 Woodmont Avenue Suite  
750

Bethesda, Maryland 20814-  
2762

Phone: (301) 347-9300

Fax: (301) 347-9350

cbe@ascb.org

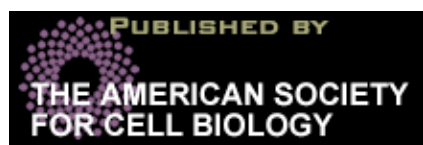

## FEATURES

- **Meeting Report: Incorporating Genomics Research into Undergraduate Curricula**  
by Betsey Dexter Dyer and Mark D. LeBlanc
- **ASCB Minorities Affairs Committee Goals: "Strengthening the Chain of Success"**  
by Donella J. Wilson and J.K. Haynes
- **Fueling Educational Reform: The HHMI Professors**  
by Stephen Barkanic
- **From the National Academies**  
by Bruce Alberts
- **Video Views and Reviews**  
by Christopher Watters
- **WWW.Cell Biology Education**  
by Robert Blystone
- **Book Review: A Short Course for Career Progression**  
by Kathryn G. Miller
- **Book Review: Advanced Biology Programs in U.S. High Schools**  
by Debra Tomanek

## ESSAY

- **Advanced High School Biology in an Era of Rapid Change: A Summary of**

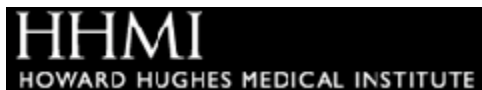

Supported in part by an  
Undergraduate Science  
Education Program  
grant from the  
Howard Hughes Medical  
Institute

## **the Biology Panel Report from the NRC Committee on Programs for Advanced Study of Mathematics and Science in American High Schools**

by William B. Wood

- **A Lab with a View: American Postdocs Abroad**  
by Amy Gladfelter
- **Cloning, Stem Cells, and the Current National Debate: Incorporating Ethics into a Large Introductory Biology Course**  
by Rachel D. Fink

## **ARTICLES**

---

- **Learning Cell Biology as a Team: A Project-Based Approach to Upper-Division Cell Biology**  
by Robin Wright and James Boggs
- **Learning How Scientists Work: Experiential Research Projects to Promote Cell Biology Learning and Scientific Process Skills**  
by Shubhik K. DebBurman
- **Analysis of Protein Localization and Secretory Pathway Function Using the Yeast *Saccharomyces cerevisiae***  
by Elizabeth Vallen

## **FEATURES**

---

- **Approaches to Cell Biology Teaching: A Primer on Standards**  
by Kimberly Tanner and Deborah Allen

## **ANNOUNCEMENTS**

---

September 3–7, 2005, Sydney, Australia  
**15th International Society of  
Developmental Biologists Congress**

**Submit Your Manuscript**  
Online Manuscript Submission

- **Instructions to Authors**
- **Top Ten Reasons to Publish in CBE**  
[pdf]

**Other Information:**

There are **6,450** registered users signed up to receive quarterly notification of new content.

[Become a registered user.](#)

**Order a Free CBE Poster**

*On the Cover* [\[Printable Cover\]](#)

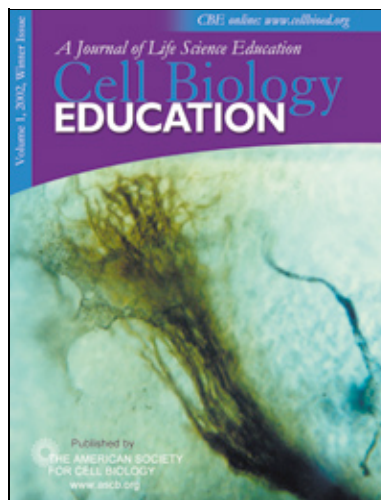

This image shows retinal ganglion cell axon terminals arborizing at their target, the optic tectum in a stage 40 *Xenopus* tadpole. Retinal ganglion cell axons are stained red/brown by horseradish peroxidase and black melanocytes are also visible.

-Image courtesy of Jay Volinski (Bowdoin College, 2000) from his neuroscience honors project with Dr. Barbara Lom.
